# Supplementary material for: Natural variation in Arabidopsis thaliana Cd responses and the detection of quantitative trait loci affecting Cd tolerance
Source: PubMed Central journal article supplement (PMC5473843; doi:10.1038/s41598-017-03540-z), 2017-06-16
Supplement: 41598_2017_3540_MOESM1_ESM.pdf [file 41598_2017_3540_MOESM1_ESM.pdf]

## **Supplementary files**

### **Natural variation in *Arabidopsis thaliana* Cd responses and the detection of quantitative trait loci affecting Cd tolerance**

Sina Fischer<sup>1,2</sup>, Thomas Spielau<sup>1</sup> and Stephan Clemens<sup>1\*</sup>

<sup>1</sup>Department of Plant Physiology, and Bayreuth Center of Ecology and Environmental Research, University of Bayreuth, Universitätsstrasse 30, 95447 Bayreuth, Germany

<sup>2</sup>School of Biosciences, University of Nottingham, Sutton Bonington Campus, Loughborough, Leicestershire, LE12 5RD, UK

Supplementary Fig. S1: Natural variation in *A. thaliana* Cu tolerance.

Supplementary Fig. S2: Metal accumulation in Cd- or Zn-treated Col-0 and Bur-0 plants.

Supplementary Fig. S3: QTL mapping based on the relative seedling weight.

Supplementary Fig. S4: The *HMA3*<sub>Bur-0</sub> allele does not confer higher Cd tolerance to Col-0 or the Cd hypersensitive mutant *cad1-3*.

Supplementary Fig. S5: Physiological characterization of Col-0 and Bur-0 plants analyzed for root transcriptome changes upon Cd exposure.

Supplementary Fig. S6: Cluster analysis of differentially regulated genes of QTL5.

Supplementary Tab. S1: SIFT analysis of genes with nonsynonymous differences between Bur-0 and Col-0 in the QTL region on chromosome 5.

Supplementary Tab. S2: SIFT analysis of genes with nonsynonymous differences between Bur-0, Cvi-0 and St-0 versus Col-0 in the QTL region on chromosome 5

## Supplementary Figure S1 (Fischer et al.)

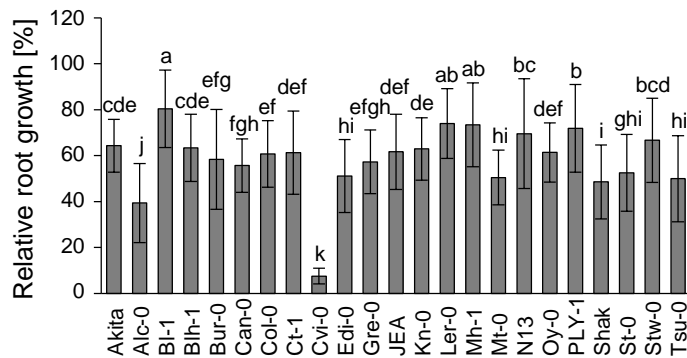

**Supplementary Fig. S1: Natural variation in *A. thaliana* Cu tolerance.** 23 accessions of the Versailles Core24 were grown on vertical agar plates under control conditions or in the presence of 10  $\mu\text{M}$   $\text{CuSO}_4$ . Length of primary roots was determined after 12-14 d. Relative root growth of seedlings as an indicator for tolerance was calculated as follows: root length metal treatment/mean root length control conditions  $\times$  100. Data represent means  $\pm$ SD. Per accession 17 to 185 plants were compared. The average n was 119. Statistical analysis was performed via one-way ANOVA and data were grouped based on Tukey's 95% confidence intervals.

## Supplementary Figure S2 (Fischer et al.)

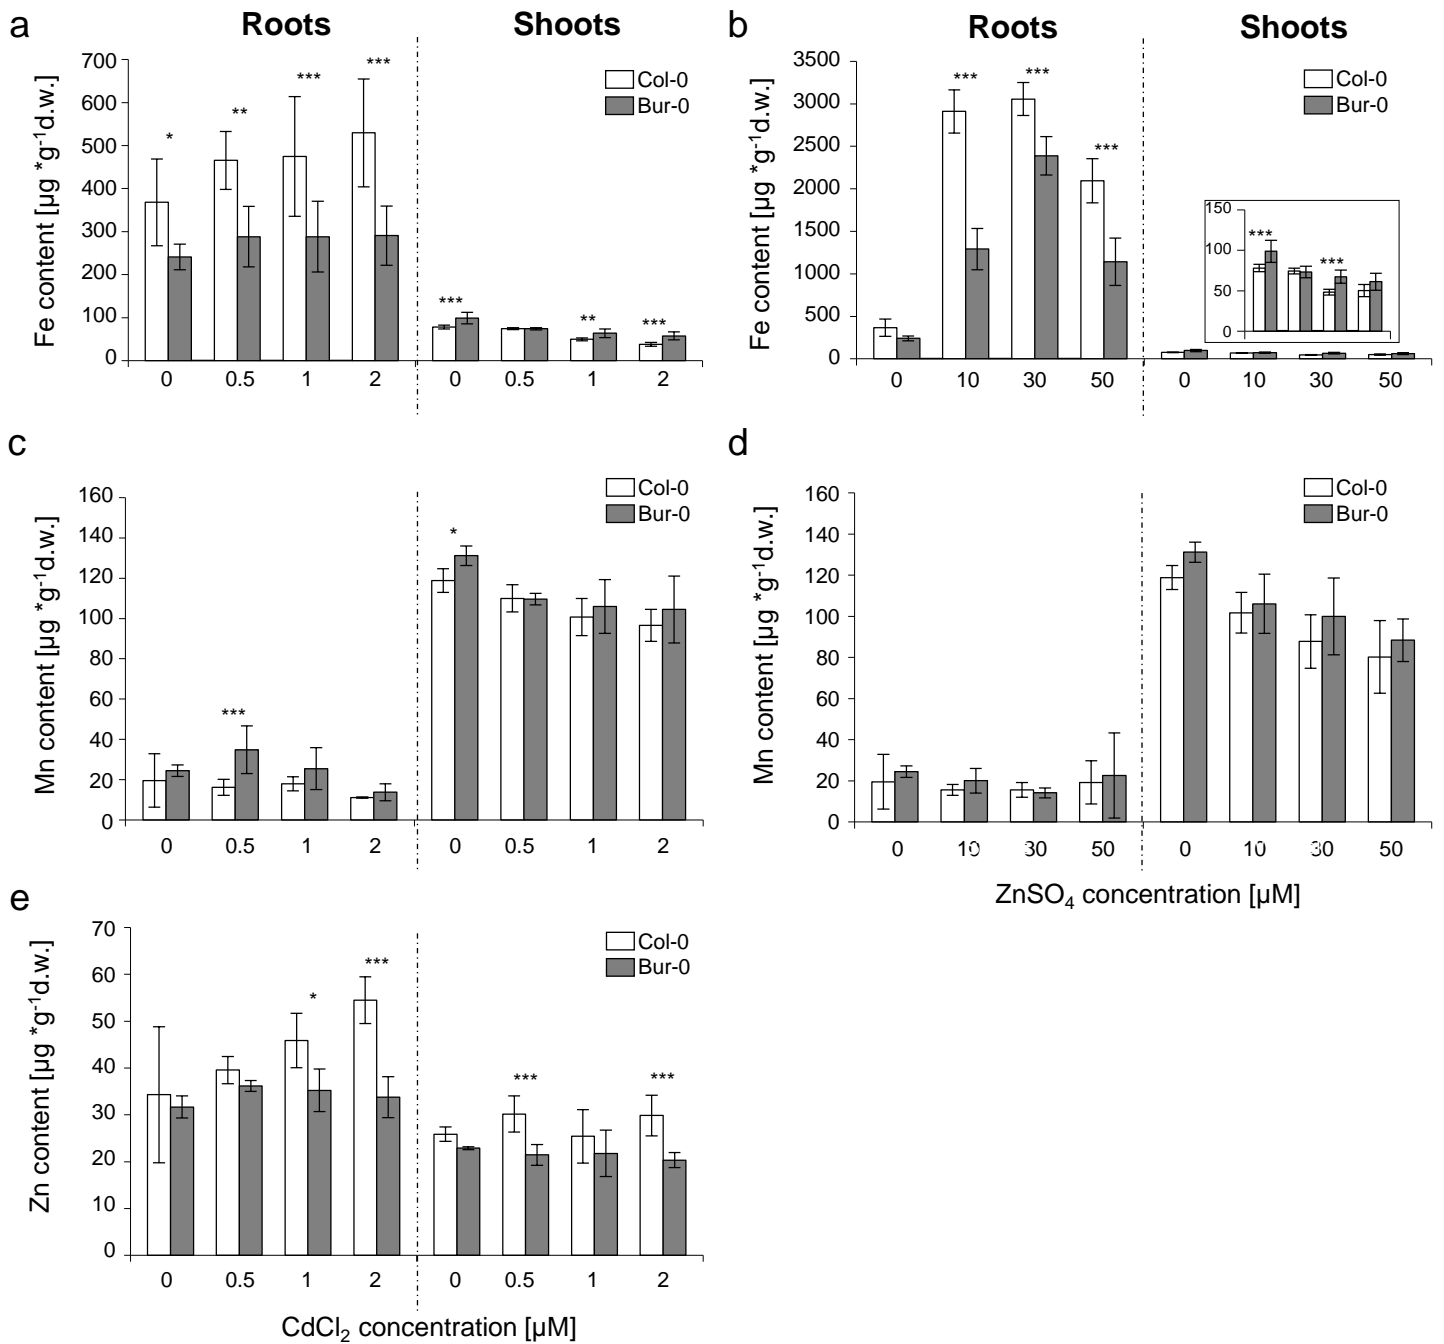

**Supplementary Fig. S2: Metal accumulation in Cd- or Zn-treated Col-0 and Bur-0 plants.** Fe (a, b), Mn (c, d) and Zn (e) content of hydroponically grown Col-0 (white bars) and Bur-0 (grey bars) plants was determined in roots and shoots after six weeks of growth. For the last week of cultivation, different concentrations of CdCl<sub>2</sub> (left) or ZnSO<sub>4</sub> (right) were added to the medium. Please note that Cd content of plants grown in the absence of CdCl<sub>2</sub> was below the detection limit. Data represent means  $\pm$ SD of 3 independent experiments (n=6, i.e. two sample pools per plant line and condition). Statistical analysis was performed by one-way ANOVA and subsequent Tukey test. The asterisks indicate significant differences between the accessions (\*\*\*,  $P < 0.001$ ; \*\*,  $P < 0.01$ ; \*,  $P < 0.05$ ), 95% confidence interval.

## Supplementary Figure S3 (Fischer et al.)

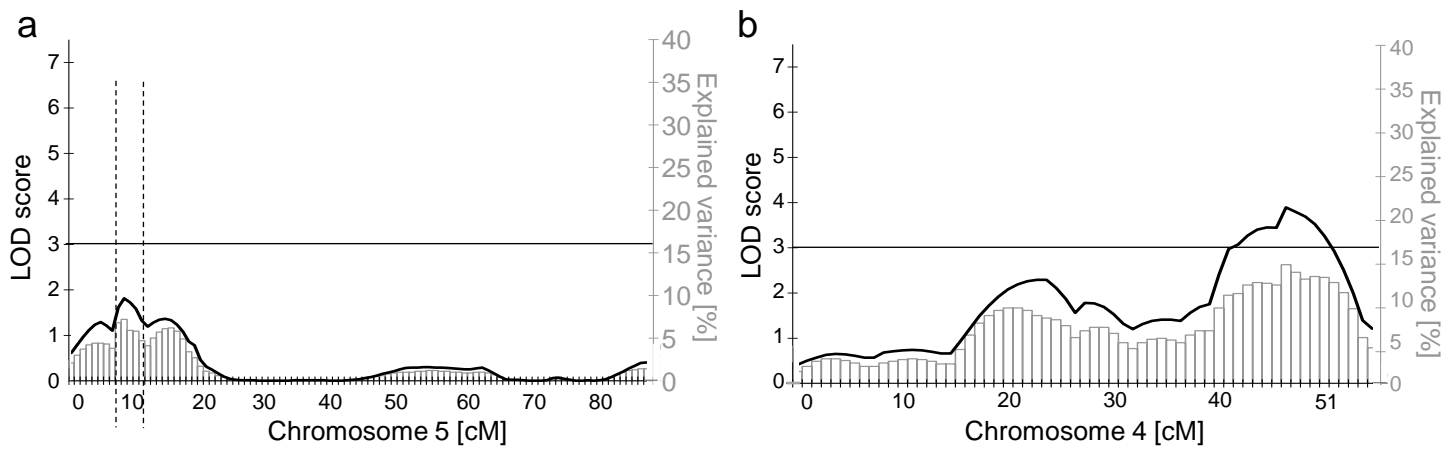

**Supplementary Fig. S3: QTL mapping based on the relative seedling weight.** After cultivation of 131 RILs at 2  $\mu\text{M}$   $\text{CdCl}_2$  QTLs were detected on chromosome 5 (a) and on chromosome 4 (b). Dotted vertical lines show the position of the highest LOD score for the RRG (see Fig. 6) to be overlapping with the region quantified by relative seedling weight. The horizontal line indicates the threshold of LOD 3, used to indicate the 95% confidence interval.

## Supplementary Figure S4 (Fischer et al.)

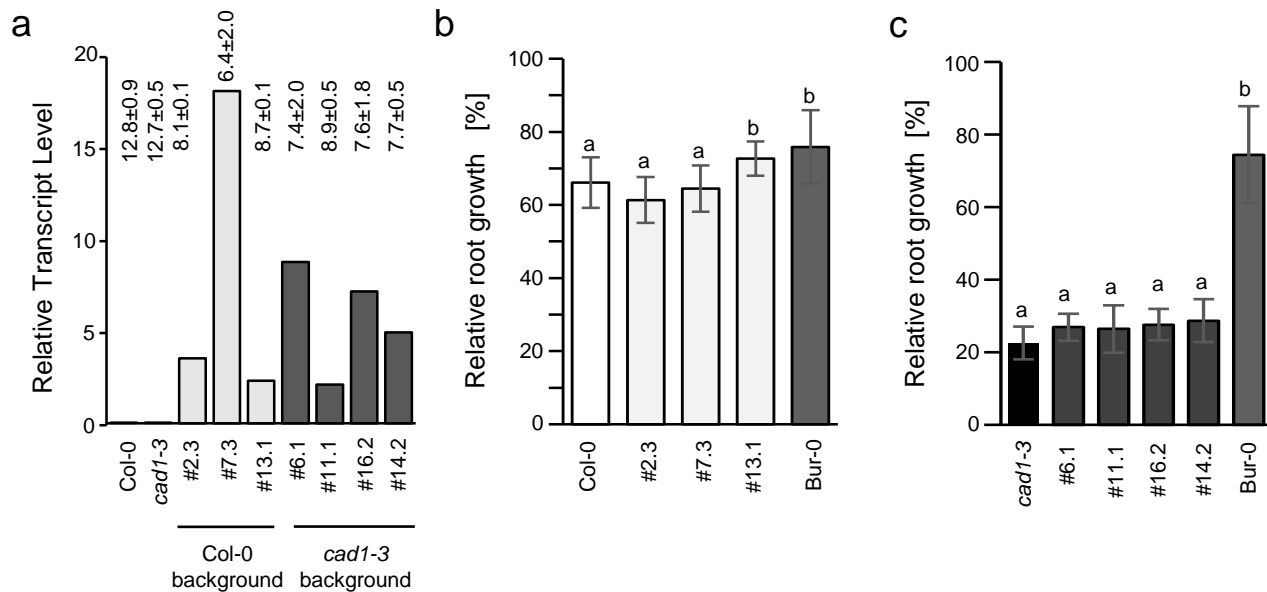

**Supplementary Fig. S4: The *HMA3*<sub>Bur-0</sub> allele does not confer higher Cd tolerance to Col-0 or the Cd hypersensitive mutant *cad1-3*.** Three independent transgenic Col-0 lines and 4 independent transgenic *cad1-3* lines transformed with a genomic version of the Bur-0 *HMA3* allele were randomly chosen and analyzed for *HMA3* expression. (a) The mean relative transcript level (RTL =  $2^{-\Delta CT} \times 1000$ ) is shown with mean  $\Delta CT \pm$  standard deviation of two independent experiments. The Cd tolerance was assessed for the lines in Col-0 background (b) and *cad1-3* background (c) in comparison with Bur-0 and the respective untransformed lines by growing seedlings under control conditions and in the presence of 2  $\mu\text{M}$  CdCl<sub>2</sub> or 1  $\mu\text{M}$  CdCl<sub>2</sub>, respectively. Relative root growth of seedlings as an indicator for tolerance was calculated as follows: root length metal treatment/mean root length control conditions  $\times$  100. Data were derived from 2 independent experiments with n=14-75 plants per genotype and condition. Statistical analysis was performed via one-way ANOVA and data were grouped based on Tukey's 95% confidence intervals.

## Supplementary Figure S5 (Fischer et al.)

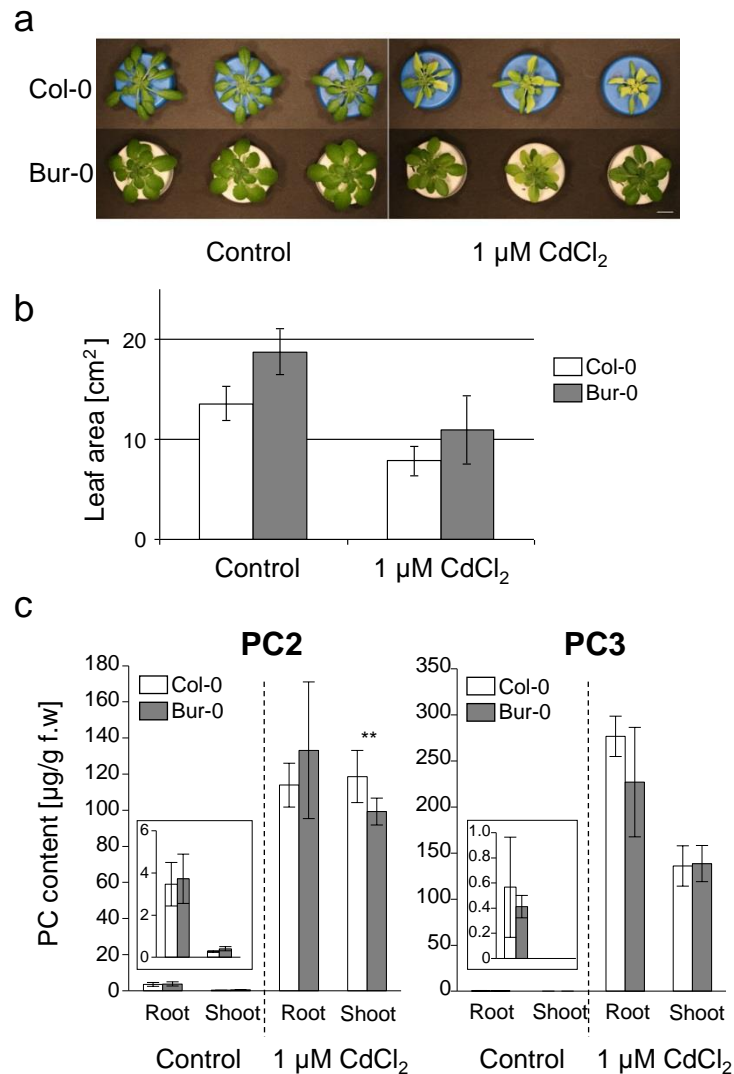

**Supplementary Fig. S5: Physiological characterization of Col-0 and Bur-0 plants analyzed for root transcriptome changes upon Cd exposure.** Hydroponically grown Bur and Col plants were treated with 1  $\mu\text{M CdCl}_2$  for one week. This resulted in comparable growth reduction as indicated by leaf area (a, b). (c) Cd-exposed roots showed a similar degree of Cd-activated phytochelatin accumulation (PC2 and PC3). Data represent means  $\pm$ SD of 4 independent experiments. Statistical analysis was performed by one-way ANOVA and subsequent Tukey test. The asterisks indicate significant differences between the accessions (\*\*,  $P < 0.01$ ), 95% confidence interval.

## Supplementary Figure S6 (Fischer et al.)

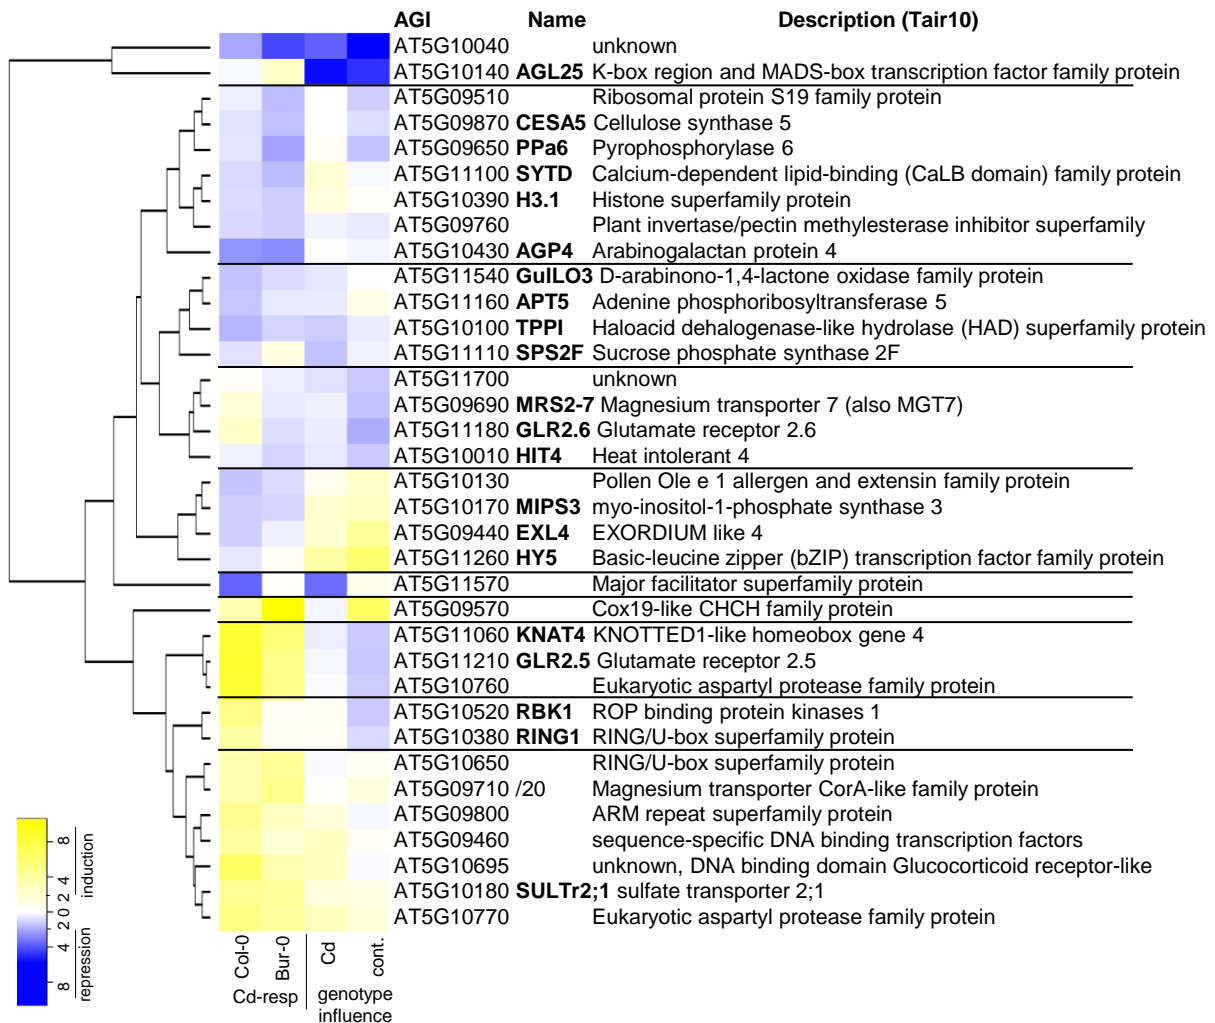

**Supplementary Fig. S6: Cluster analysis of differentially regulated genes of QTL5.** Cluster analysis (performed with R version 3.3.1) of all genes within the QTL region on chromosome 5 from 2.9 to 3.84 Mb that showed a significant 2fold expression difference between treatments or genotypes. Scale indicates fold changes, yellow at least 2fold upregulation upon Cd-treatment or in Bur-0 compared to Col-0, blue at least 2fold downregulation upon Cd-treatment or in Bur-0 compared to Col-0.

# Supplementary Table S1 (Fischer et al.)

| Supplementary Table S1: SIFT analysis of genes with nonsynonymous differences between Bur-0 and Col-0 in the QTL region on chromosome 5. |                                                                                                 |          |                |                    |                                       |                                            |
|------------------------------------------------------------------------------------------------------------------------------------------|-------------------------------------------------------------------------------------------------|----------|----------------|--------------------|---------------------------------------|--------------------------------------------|
| AGI                                                                                                                                      | Description                                                                                     | Alias    | accession      | Position on Chr. 5 | effect                                | SIFT prediction (*WARNING! low confidence) |
| functional in Bur-0 but not in Col-0                                                                                                     |                                                                                                 |          |                |                    |                                       |                                            |
| AT5G09690                                                                                                                                | magnesium transporter 7                                                                         | MGT7     | Bur-0<br>Col-0 | 3002302<br>3002302 | AA exchange: F to S<br>original AA: F | TOLERATED<br>DELETERIOUS                   |
| AT5G11250                                                                                                                                | Disease resistance protein (TIR-NBS-LRR class)                                                  |          | Bur-0<br>Col-0 | 3591386<br>3591386 | AA exchange: W to L<br>original AA: W | TOLERATED<br>DELETERIOUS                   |
| functional in Col-0 but not in Bur-0                                                                                                     |                                                                                                 |          |                |                    |                                       |                                            |
| AT5G09410                                                                                                                                | ethylene induced calmodulin binding protein                                                     | EICBP.B  | Bur-0          | 2921436            | AA exchange: D to N                   | DELETERIOUS *                              |
| AT5G09420                                                                                                                                | translocon at the outer membrane of chloroplasts 64-V                                           | TOC64-V  | Bur-0          | 2926859            | AA exchange: L to F                   | DELETERIOUS                                |
| AT5G09450                                                                                                                                | Tetratricopeptide repeat (TPR)-like superfamily protein                                         |          | Bur-0          | 2928544            | AA exchange: S to T                   | DELETERIOUS                                |
| AT5G09580                                                                                                                                | heat shock protein                                                                              |          | Bur-0          | 2942542            | AA exchange: D to H                   | DELETERIOUS                                |
| AT5G09610                                                                                                                                | pumilio 21                                                                                      | PUM21    | Bur-0          | 2972814            | AA exchange: A to G                   | DELETERIOUS                                |
| AT5G09680                                                                                                                                | reduced lateral root formation                                                                  | RLF      | Bur-0          | 2981652            | AA exchange: S to F                   | DELETERIOUS *                              |
| AT5G09700                                                                                                                                | Glycosyl hydrolase family protein                                                               |          | Bur-0          | 2999387            | AA exchange: T to I                   | DELETERIOUS *                              |
|                                                                                                                                          |                                                                                                 |          | Bur-0          | 3003953            | AA exchange: E to Q                   | DELETERIOUS                                |
|                                                                                                                                          |                                                                                                 |          | Bur-0          | 3004198            | AA exchange: Y to F                   | DELETERIOUS                                |
|                                                                                                                                          |                                                                                                 |          | Bur-0          | 3004551            | AA exchange: P to Q                   | DELETERIOUS                                |
|                                                                                                                                          |                                                                                                 |          | Bur-0          | 3012631            | 1 base deletion in exon               |                                            |
| AT5G09720                                                                                                                                | Magnesium transporter CorA-like family protein                                                  |          | Bur-0          | 3013430            | AA exchange: L to F                   | DELETERIOUS                                |
|                                                                                                                                          |                                                                                                 |          | Bur-0          | 3014186            | AA exchange: V to I                   | DELETERIOUS                                |
|                                                                                                                                          |                                                                                                 |          | Bur-0          | 3014216            | AA exchange: S to P                   | DELETERIOUS                                |
| AT5G09850                                                                                                                                | Transcription elongation factor (TFIIS) family protein                                          |          | Bur-0          | 3064235            | AA exchange: S to P                   | DELETERIOUS                                |
| AT5G09870                                                                                                                                | cellulose synthase 5                                                                            | CESA5    | Bur-0          | 3074802            | AA exchange: R to M                   | DELETERIOUS                                |
| AT5G09978                                                                                                                                | elicitor peptide 7 precursor                                                                    | PEP7     | Bur-0          | 3120756            | AA exchange: G to E                   | DELETERIOUS                                |
| AT5G09995                                                                                                                                | transmembrane protein                                                                           |          | Bur-0          | 3126065            | AA exchange: G to R                   | DELETERIOUS                                |
| AT5G10040                                                                                                                                | transmembrane protein                                                                           |          | Bur-0          | 3143919            | 1 base insertion in Exon              |                                            |
| AT5G10060                                                                                                                                | ENTH/VHS family protein                                                                         |          | Bur-0          | 3147133            | AA exchange: G to V                   | DELETERIOUS                                |
| AT5G10070                                                                                                                                | RNase L inhibitor protein-like protein                                                          |          | Bur-0          | 3148796            | AA exchange: D to A                   | DELETERIOUS                                |
| AT5G10120                                                                                                                                | Ethylene insensitive 3 family protein                                                           |          | Bur-0          | 3170090            | AA exchange: Q to P                   | DELETERIOUS                                |
| AT5G10210                                                                                                                                | nitric oxide synthase-interacting protein                                                       |          | Bur-0          | 3206360            | AA exchange: N to S                   | DELETERIOUS                                |
|                                                                                                                                          |                                                                                                 |          | Bur-0          | 3206627            | AA exchange: V to E                   | DELETERIOUS                                |
| AT5G10220                                                                                                                                | annexin 6                                                                                       | ANN6     | Bur-0          | 3207655            | AA exchange: Y to N                   | DELETERIOUS                                |
| AT5G10230                                                                                                                                | annexin 7                                                                                       | ANNAT7   | Bur-0          | 3210138            | 2 base insertion in Exon              |                                            |
| AT5G10250                                                                                                                                | Phototropic-responsive NPH3 family protein                                                      | DOT3     | Bur-0          | 3218439            | AA exchange: R to H                   | DELETERIOUS                                |
| AT5G10440                                                                                                                                | cyclin d4;2                                                                                     | CYCD4;2  | Bur-0          | 3281712            | AA exchange: Q to H                   | DELETERIOUS                                |
| AT5G10590                                                                                                                                | hypothetical protein                                                                            |          | Bur-0          | 3349145            | 1 base insertion in Exon              |                                            |
|                                                                                                                                          |                                                                                                 |          | Bur-0          | 3349163            | AA exchange: I to L                   | DELETERIOUS *                              |
|                                                                                                                                          |                                                                                                 |          | Bur-0          | 3360634            | AA exchange: Y to C                   | DELETERIOUS                                |
| AT5G10630                                                                                                                                | Translational elongation factor EF1A/initiation factor IF2gamma family protein                  |          | Bur-0          | 3361543            | AA exchange: N to Y                   | DELETERIOUS                                |
|                                                                                                                                          |                                                                                                 |          | Bur-0          | 3362055            | AA exchange: D to N                   | DELETERIOUS                                |
|                                                                                                                                          |                                                                                                 |          | Bur-0          | 3362260            | AA exchange: K to T                   | DELETERIOUS                                |
|                                                                                                                                          |                                                                                                 |          | Bur-0          | 3372242            | AA exchange: K to T                   | DELETERIOUS *                              |
| AT5G10660                                                                                                                                | calmodulin-binding protein-like protein                                                         |          | Bur-0          | 3377057            | AA exchange: N to K                   | DELETERIOUS *                              |
| AT5G10690                                                                                                                                | pentatricopeptide (PPR) repeat-containing protein / CBS domain-containing protein               |          | Bur-0          | 3403657            | AA exchange: A to T                   | DELETERIOUS                                |
| AT5G10770                                                                                                                                | Eukaryotic aspartyl protease family protein                                                     |          | Bur-0          | 3412914            | AA exchange: R to I                   | DELETERIOUS *                              |
| AT5G10800                                                                                                                                | RNA recognition motif (RRM)-containing protein                                                  |          | Bur-0          | 3433752            | AA exchange: G to E                   | DELETERIOUS *                              |
| AT5G10880                                                                                                                                | tRNA synthetase-related / tRNA ligase-like protein                                              |          | Bur-0          | 3433832            | AA exchange: A to P                   | DELETERIOUS *                              |
|                                                                                                                                          |                                                                                                 |          | Bur-0          | 3491931            | AA exchange: E to K                   | DELETERIOUS                                |
| AT5G11030                                                                                                                                | aberrant root formation protein                                                                 | ALF4     | Bur-0          | 3491965            | AA exchange: C to W                   | DELETERIOUS                                |
| AT5G11080                                                                                                                                | Ubiquitin-like superfamily protein                                                              |          | Bur-0          | 3518690            | AA exchange: T to I                   | DELETERIOUS *                              |
| AT5G11180                                                                                                                                | glutamate receptor 2.6                                                                          | GLR2.6   | Bur-0          | 3559864            | AA exchange: E to G                   | DELETERIOUS                                |
| AT5G11210                                                                                                                                | glutamate receptor 2.5                                                                          | GLR2.5   | Bur-0          | 3573045            | AA exchange: T to A                   | DELETERIOUS                                |
| AT5G11230                                                                                                                                | Nucleotide-sugar transporter family protein                                                     |          | Bur-0          | 3581292            | AA exchange: C to S                   | DELETERIOUS                                |
| AT5G11350                                                                                                                                | DNase I-like superfamily protein                                                                |          | Bur-0          | 3624489            | AA exchange: T to I                   | DELETERIOUS                                |
| AT5G11400                                                                                                                                | Protein kinase superfamily protein                                                              |          | Bur-0          | 3625188            | AA exchange: R to C                   | DELETERIOUS                                |
| AT5G11412                                                                                                                                | RNA-binding (RRM/RBD/RNP motifs) family protein                                                 |          | Bur-0          | 3637108            | 1 base deletion in exon               |                                            |
|                                                                                                                                          |                                                                                                 |          | Bur-0          | 3640445            | 1 base insertion in Exon              |                                            |
| AT5G11416                                                                                                                                | hypothetical protein                                                                            |          | Bur-0          | 3643009            | AA exchange: M to R: Start lost!      | DELETERIOUS *                              |
| AT5G11450                                                                                                                                | PsbP domain protein (Mog1/PsbP/DUF1795-like photosystem II reaction center PsbP family protein) | PPD5     | Bur-0          | 3655222            | AA exchange: R to S                   | DELETERIOUS                                |
| AT5G11460                                                                                                                                | hypothetical protein (DUF581)                                                                   |          | Bur-0          | 3657562            | AA exchange: Y to C                   | DELETERIOUS                                |
| AT5G11470                                                                                                                                | bromo-adjacent homology (BAH) domain-containing protein                                         |          | Bur-0          | 3666881            | AA exchange: P to L                   | DELETERIOUS *                              |
|                                                                                                                                          |                                                                                                 |          | Bur-0          | 3717340            | AA exchange: L to V                   | DELETERIOUS                                |
| AT5G11570                                                                                                                                | Major facilitator superfamily protein                                                           |          | Bur-0          | 3717904            | AA exchange: I to T                   | DELETERIOUS                                |
|                                                                                                                                          |                                                                                                 |          | Bur-0          | 3718231            | AA exchange: G to C                   | DELETERIOUS                                |
| AT5G11580                                                                                                                                | Regulator of chromosome condensation (RCC1) family protein                                      |          | Bur-0          | 3720137            | AA exchange: D to A                   | DELETERIOUS                                |
| AT5G11610                                                                                                                                | Exostosin family protein                                                                        |          | Bur-0          | 3737307            | AA exchange: R to T                   | DELETERIOUS                                |
| AT5G11650                                                                                                                                | alpha/beta-Hydrolases superfamily protein                                                       |          | Bur-0          | 3746805            | AA exchange: S to G                   | DELETERIOUS *                              |
| AT5G11670                                                                                                                                | NADP-malic enzyme 2                                                                             | NADP-ME2 | Bur-0          | 3755442            | AA exchange: G to D                   | DELETERIOUS                                |
| AT5G11760                                                                                                                                | stress response protein                                                                         |          | Bur-0          | 3789967            | AA exchange: D to Y                   | DELETERIOUS                                |
| AT5G11850                                                                                                                                | Protein kinase superfamily protein                                                              |          | Bur-0          | 3820180            | AA exchange: V to I                   | DELETERIOUS                                |
| AT5G11920                                                                                                                                | 6- $\alpha$ -fructan exohydrolase                                                               | cwINV6   | Bur-0          | 3840297            | AA exchange: P to L                   | DELETERIOUS                                |
| non-functional in Col-0 and in Bur-0                                                                                                     |                                                                                                 |          |                |                    |                                       |                                            |
| AT5G09730                                                                                                                                | beta-xylosidase 3                                                                               | BXL3     | Bur-0<br>Col-0 | 3016640<br>3016640 | AA exchange: G to A<br>original AA: G | TOLERATED<br>DELETERIOUS                   |
|                                                                                                                                          |                                                                                                 |          | Bur-0          | 3015801            | AA exchange: S to C                   | DELETERIOUS                                |
|                                                                                                                                          |                                                                                                 |          | Bur-0          | 3017348            | AA exchange: N to H                   | DELETERIOUS                                |



# Supplementary Table S2 (Fischer et al.)

| Supplementary Table S2: SIFT analysis of genes with nonsynonymous differences between Bur-0, Cvi-0 and St-0 versus Col-0 in the QTL region on chromosome 5 |                                                         |          |                        |                               |                                                                                |                                            |
|------------------------------------------------------------------------------------------------------------------------------------------------------------|---------------------------------------------------------|----------|------------------------|-------------------------------|--------------------------------------------------------------------------------|--------------------------------------------|
| AGI                                                                                                                                                        | Description                                             | Alias    | accession              | Position on Chr. 5            | effect                                                                         | SIFT prediction (*WARNING! low confidence) |
| functional in Bur-0, Cvi-0 and St-0 but not in Col-0                                                                                                       |                                                         |          |                        |                               |                                                                                |                                            |
| AT5G09690                                                                                                                                                  | magnesium transporter 7                                 | MGT7     | Cvi-0<br>St-0<br>Col-0 | 3002303<br>3002304<br>3002302 | AA exchange: F to S<br>AA exchange: F to S<br>original AA: F                   | TOLERATED<br>TOLERATED<br>DELETERIOUS      |
| functional in Cvi-0 or St-0 but not in Col-0                                                                                                               |                                                         |          |                        |                               |                                                                                |                                            |
| AT5G09730                                                                                                                                                  | beta-xylosidase 3                                       | BXL3     | Cvi-0<br>Col-0         | 3016640<br>3016640            | AA exchange: G to A<br>original AA: F                                          | TOLERATED<br>DELETERIOUS                   |
| AT5G10420                                                                                                                                                  | MATE efflux family protein                              |          | Cvi-0<br>Col-0         | 3276056<br>3276056            | AA exchange: E to K<br>original AA: F                                          | TOLERATED<br>DELETERIOUS                   |
| AT5G10560                                                                                                                                                  | Glycosyl hydrolase family protein                       | BXL6     | Cvi-0<br>St-0<br>Col-0 | 3339170<br>3339170<br>3339170 | AA exchange: M to T<br>AA exchange: M to T<br>original AA: F                   | TOLERATED<br>TOLERATED<br>DELETERIOUS      |
| AT5G11250                                                                                                                                                  | Disease resistance protein (TIR-NBS-LRR class)          |          | Cvi-0<br>St-0<br>Col-0 | 3591386<br>3591386<br>3591386 | AA exchange: W to L<br>AA exchange: W to L<br>original AA: F                   | TOLERATED<br>TOLERATED<br>DELETERIOUS      |
| functional in Col-0 but not in Bur-0 and Cvi-0 and St-0                                                                                                    |                                                         |          |                        |                               |                                                                                |                                            |
| AT5G09450                                                                                                                                                  | Tetratricopeptide repeat (TPR)-like superfamily protein |          | Cvi-0<br>St-0          | 2942542<br>2942542            | nonsynonymous AA exchange from D to H<br>nonsynonymous AA exchange from D to H | DELETERIOUS<br>DELETERIOUS                 |
| AT5G09700                                                                                                                                                  | Glycosyl hydrolase family protein                       |          | Cvi-0                  | 3003953                       | nonsynonymous AA exchange from E to Q                                          | DELETERIOUS                                |
|                                                                                                                                                            |                                                         |          | St-0                   | 3003953                       | nonsynonymous AA exchange from E to Q                                          | DELETERIOUS                                |
|                                                                                                                                                            |                                                         |          | St-0                   | 3003992                       | STOP-GAIN, AA exchange from Q to *                                             |                                            |
|                                                                                                                                                            |                                                         |          | Cvi-0                  | 3004198                       | nonsynonymous AA exchange from Y to F                                          | DELETERIOUS                                |
|                                                                                                                                                            |                                                         |          | St-0                   | 3004198                       | nonsynonymous AA exchange from Y to F                                          | DELETERIOUS                                |
|                                                                                                                                                            |                                                         |          | Cvi-0                  | 3004551                       | nonsynonymous AA exchange from P to Q                                          | DELETERIOUS                                |
|                                                                                                                                                            |                                                         |          | St-0                   | 3004551                       | nonsynonymous AA exchange from P to Q                                          | DELETERIOUS                                |
|                                                                                                                                                            |                                                         |          | Cvi-0                  | 3004624                       | nonsynonymous AA exchange from D to Y                                          | DELETERIOUS                                |
|                                                                                                                                                            |                                                         |          | St-0                   | 3004624                       | nonsynonymous AA exchange from D to Y                                          | DELETERIOUS                                |
|                                                                                                                                                            |                                                         |          | St-0                   | 3004940                       | nonsynonymous AA exchange from I to M                                          | DELETERIOUS                                |
| AT5G09978                                                                                                                                                  | elicitor peptide 7 precursor                            | PEP7     | Cvi-0                  | 3120756                       | nonsynonymous AA exchange from G to E                                          | DELETERIOUS                                |
|                                                                                                                                                            |                                                         |          | St-0                   | 3120756                       | nonsynonymous AA exchange from G to E                                          | DELETERIOUS                                |
| AT5G10250                                                                                                                                                  | Phototropic-responsive NPH3 family protein              | DOT3     | Cvi-0                  | 3217804                       | nonsynonymous AA exchange from I to T                                          | DELETERIOUS                                |
|                                                                                                                                                            |                                                         |          | Cvi-0                  | 3218398                       | nonsynonymous AA exchange from A to S                                          | DELETERIOUS                                |
|                                                                                                                                                            |                                                         |          | St-0                   | 3218617                       | nonsynonymous AA exchange from W to R                                          | DELETERIOUS                                |
| AT5G10590                                                                                                                                                  |                                                         |          | Cvi-0                  | 3349389                       | nonsynonymous AA exchange from I to S                                          | DELETERIOUS *                              |
|                                                                                                                                                            |                                                         |          | St-0                   | 3349389                       | nonsynonymous AA exchange from I to S                                          | DELETERIOUS *                              |
|                                                                                                                                                            |                                                         |          | Cvi-0                  | 3349427                       | nonsynonymous AA exchange from K to N                                          | DELETERIOUS *                              |
|                                                                                                                                                            |                                                         |          | St-0                   | 3349427                       | nonsynonymous AA exchange from K to N                                          | DELETERIOUS *                              |
|                                                                                                                                                            |                                                         |          | Cvi-0                  | 3349456                       | nonsynonymous AA exchange from S to T                                          | DELETERIOUS *                              |
|                                                                                                                                                            |                                                         |          | St-0                   | 3349456                       | nonsynonymous AA exchange from S to T                                          | DELETERIOUS *                              |
| AT5G10800                                                                                                                                                  | RNA recognition motif (RRM)-containing protein          |          | Cvi-0                  | 3412914                       | nonsynonymous AA exchange from R to I                                          | DELETERIOUS *                              |
|                                                                                                                                                            |                                                         |          | St-0                   | 3413152                       | nonsynonymous AA exchange from S to P                                          | DELETERIOUS                                |
|                                                                                                                                                            |                                                         |          | St-0                   | 3413186                       | nonsynonymous AA exchange from R to S                                          | DELETERIOUS                                |
|                                                                                                                                                            |                                                         |          | St-0                   | 3414696                       | nonsynonymous AA exchange from S to I                                          | DELETERIOUS                                |
|                                                                                                                                                            |                                                         |          | St-0                   | 3414706                       | nonsynonymous AA exchange from I to F                                          | DELETERIOUS                                |
|                                                                                                                                                            |                                                         |          | St-0                   | 3417311                       | STOP-GAIN, AA exchange from R to *                                             |                                            |
|                                                                                                                                                            |                                                         |          | St-0                   | 3433791                       | nonsynonymous AA exchange from E to G                                          | DELETERIOUS *                              |
| AT5G11180                                                                                                                                                  | glutamate receptor 2.6                                  | ATGLR2.6 | St-0                   | 3557799                       | nonsynonymous AA exchange from L to H                                          | DELETERIOUS                                |
|                                                                                                                                                            |                                                         |          | Cvi-0                  | 3559864                       | nonsynonymous AA exchange from E to G                                          | DELETERIOUS                                |
|                                                                                                                                                            |                                                         |          | St-0                   | 3560096                       | nonsynonymous AA exchange from E to K                                          | DELETERIOUS                                |
|                                                                                                                                                            |                                                         |          | St-0                   | 3560257                       | STOP-GAIN, AA exchange from L to *                                             |                                            |
| AT5G11210                                                                                                                                                  | glutamate receptor 2.5                                  | ATGLR2.5 | Cvi-0                  | 3573045                       | nonsynonymous AA exchange from T to A                                          | DELETERIOUS                                |
|                                                                                                                                                            |                                                         |          | St-0                   | 3573045                       | nonsynonymous AA exchange from T to A                                          | DELETERIOUS                                |
|                                                                                                                                                            |                                                         |          | Cvi-0                  | 3573695                       | nonsynonymous AA exchange from G to D                                          | DELETERIOUS                                |
| AT5G11416                                                                                                                                                  |                                                         |          | Cvi-0                  | 3643009                       | START-LOST, AA exchange from M to R                                            | DELETERIOUS *                              |
|                                                                                                                                                            |                                                         |          | St-0                   | 3643009                       | START-LOST, AA exchange from M to R                                            | DELETERIOUS *                              |
| AT5G11470                                                                                                                                                  | bromo-adjacent homology (BAH) domain-containing protein |          | Cvi-0                  | 3663687                       | nonsynonymous AA exchange from G to E                                          | DELETERIOUS *                              |
|                                                                                                                                                            |                                                         |          | St-0                   | 3663687                       | nonsynonymous AA exchange from G to E                                          | DELETERIOUS *                              |
|                                                                                                                                                            |                                                         |          | Cvi-0                  | 3666881                       | nonsynonymous AA exchange from P to L                                          | DELETERIOUS *                              |
| AT5G11650                                                                                                                                                  | alpha/beta-Hydrolases superfamily protein               |          | Cvi-0                  | 3746805                       | nonsynonymous AA exchange from S to G                                          | DELETERIOUS *                              |
|                                                                                                                                                            |                                                         |          | St-0                   | 3746805                       | nonsynonymous AA exchange from S to G                                          | DELETERIOUS *                              |
